# Supplementary material for: Antidiabetic, Lipid Normalizing, and Nephroprotective Actions of the Strawberry: A Potent Supplementary Fruit
Source: MDPI journal article supplement (doi:10.3390/ijms18010124), 2017-01-11
Supplement: s1 [file s1]

# Supplementary Materials: Antidiabetic, Lipid Normalizing, and Nephroprotective Actions of the Strawberry: A Potent Supplementary Fruit

Pallavi Mandave, Suresh Khadke, Manjiri Karandikar, Vijaya Pandit, Prabhakar Ranjekar, Aniket Kuvalekar and Nitin Mantri

**Table S1.** Animals' food and water intake during interventions.

| Groups            | Feed Intake (gm) | Water Intake (mL) |
|-------------------|------------------|-------------------|
| Healthy control   | 22.3 ± 1.24 *    | 50.24 ± 1.93 **   |
| NIC-STZ control   | 44.1 ± 0.52      | 138.6 ± 1.64      |
| MET-treated group | 42.4 ± 9.51      | 94.19 ± 0.74 **   |
| SWE               | 37.9 ± 9.56 *    | 87.13 ± 0.63 ***  |
| SHAE              | 26.7 ± 0.28 **   | 80 ± 3.24 **      |
| SAE               | 59.8 ± 1.144 **  | 70 ± 0.45 **      |

Results are represented as mean ± SE. gm/rat/day ( $n = 6$ ); \*  $p \leq 0.05$ ; \*\*  $p \leq 0.01$ ; \*\*\*  $p \leq 0.001$  as compared to the negative control group (Dunnett Multiple Comparisons Test).

**Table S2.** The efficiency of qRT-PCR for relative quantification of mRNA. Efficiency is calculated from the slope of the curve as  $E = 10(-1/\text{slope})^{-1}$ .

| Sr. No.                            | Target Genes                                     | Symbol            | Efficiency |
|------------------------------------|--------------------------------------------------|-------------------|------------|
| <b>Fatty Acid Metabolism Genes</b> |                                                  |                   |            |
| 1                                  | Carnitine Palmitoyltransferase 1A                | CPT 1A            | 121.22     |
| 2                                  | Malonyl CoA: ACP Acyltransferase                 | MCAT              | 110.17     |
| 3                                  | Acetyl-CoA Carboxylase Alpha                     | ACACA             | 110.17     |
| 4                                  | acyl-CoA Synthetase Long-chain family member 1   | ACSL 1            | 110.17     |
| 5                                  | Fatty Acid Synthase                              | FASN              | 93.06      |
| 6                                  | Fatty Acid Binding Protein                       | FABP              | 101.30     |
| <b>Transcription Factors</b>       |                                                  |                   |            |
| 1                                  | Peroxisome Proliferator-Activated Receptor Gamma | PPAR- $\gamma$    | 100.92     |
| 2                                  | Sterol Regulatory Element-Binding Proteins       | SREBP             | 104.75     |
| 3                                  | Nuclear Factor- $\kappa\beta$                    | NF- $\kappa\beta$ | 108.43     |
| <b>Inflammatory Markers</b>        |                                                  |                   |            |
| 1                                  | Tumor Necrosis Factors- $\alpha$                 | TNF- $\alpha$     | 98.71      |
| 2                                  | Interleukin 6                                    | IL6               | 96.84      |

**Table S3.** Experimental design employed in the study.

| Days                 | HC                                                                                                       | NIC-STZ                                                       | MET                                                           | SWE                                                           | SHAE                                                            | SAE                                                           |
|----------------------|----------------------------------------------------------------------------------------------------------|---------------------------------------------------------------|---------------------------------------------------------------|---------------------------------------------------------------|-----------------------------------------------------------------|---------------------------------------------------------------|
| 1st day              | I. p. injection of saline solution and citrate buffer                                                    | I. p injection of nicotinamide (110 mg/kg) and STZ (65 mg/kg) | I. p injection of nicotinamide (110 mg/kg) and STZ (65 mg/kg) | I. p injection of nicotinamide (110 mg/kg) and STZ (65 mg/kg) | I. p injection of nicotinamide (110 mg/kg) and STZ (65 mg/kg)   | I. p injection of nicotinamide (110 mg/kg) and STZ (65 mg/kg) |
| 22nd day             | –                                                                                                        | Confirmation of stable hyperglycemia                          | Confirmation of stable hyperglycemia                          | Confirmation of stable hyperglycemia                          | Confirmation of stable hyperglycemia                            | Confirmation of stable hyperglycemia                          |
| 23rd day             | –                                                                                                        | –                                                             | Metformin (200 mg/kg body weight, Per os)                     | Strawberry water extract (2 g/kg body weight, Per os)         | Strawberry hydro-alcoholic extract (2 g/kg body weight, Per os) | Strawberry alcohol extract (2 g/kg body weight, Per os)       |
| 30th, 36th, 43rd day | Intermittent blood collection                                                                            |                                                               |                                                               |                                                               |                                                                 |                                                               |
| 50th day             | Blood samples were collected, animals were sacrificed. Liver, pancreas, brain, and kidney were harvested |                                                               |                                                               |                                                               |                                                                 |                                                               |

HC: Healthy control, NIC-STZ: NIC-STZ treated control, MET: Metformin-treated control, SWE: Strawberry water extract, SHAE: Strawberry hydro-alcoholic extract, SAE: Strawberry alcohol extract.

**Table S4.** Primer sequences of selected RT-PCR genes.

| Sr. No.                            | Target Genes                                     | Primers            | Sequence                                       |
|------------------------------------|--------------------------------------------------|--------------------|------------------------------------------------|
| <b>Housekeeping Gene</b>           |                                                  |                    |                                                |
| 1                                  | Glyceraldehyde-3-phosphate dehydrogenase         | Forward<br>Reverse | AGTTCAACGGCACAGTCAAG<br>TACTCAGCACCAGCATCACC   |
| <b>Fatty Acid Metabolism Genes</b> |                                                  |                    |                                                |
| 1                                  | Carnitine Palmitoyltransferase 1A                | Forward<br>Reverse | CACTGATGAAGGAAGAAGAC<br>CCAGTCACTCACGTAATTTG   |
| 2                                  | Malonyl CoA: ACP Acyltransferase                 | Forward<br>Reverse | AAAACCTCTAGGCTCAATCAAC<br>GGATGTGTGTATTTATGCCC |
| 3                                  | Acetyl-CoA Carboxylase Alpha                     | Forward<br>Reverse | AGCAGTATTTGAACACATGG<br>CAGTTCCAAGAAGTAGAAGC   |
| 4                                  | acyl-CoA Synthetase Long-chain family member 1   | Forward<br>Reverse | ACATTATGAACGATTGCTCC<br>GCATTACACACTCTACAACG   |
| 5                                  | Fatty Acid Synthase                              | Forward<br>Reverse | AAAAGGAAAGTAGAGTGTGC<br>GACACATTCTGTTCACTACAG  |
| 6                                  | Fatty Acid Binding Protein                       | Forward<br>Reverse | TGGAGGGTGACAATAAAATG<br>TCATGGTATTGGTGATTGTG   |
| <b>Transcription Factors</b>       |                                                  |                    |                                                |
| 1                                  | Peroxisome Proliferator-Activated Receptor Gamma | Forward<br>Reverse | AAGACAACAGACAAATCACC<br>CAGGGATATTTTTGGCATACTC |
| 2                                  | Sterol Regulatory Element-Binding Proteins       | Forward<br>Reverse | AAACCTGAAGTGGTAGAAAC<br>TTATCCTCAAAGGCTGGG     |
| 3                                  | Nuclear Factor- $\kappa$ B                       | Forward<br>Reverse | AAAAACGAGCCTAGAGATTG<br>ACATCCTCTTCCTTGTCTTC   |
| <b>Inflammatory Markers</b>        |                                                  |                    |                                                |
| 1                                  | Tumor Necrosis Factors- $\alpha$                 | Forward<br>Reverse | CTCACACTCAGATCATCTTC<br>GAGAACCTGGGAGTAGATAAG  |
| 2                                  | Interleukin 6                                    | Forward<br>Reverse | CAGAGTCATTCAAGCAATAC<br>CTTTCAAGATGAGTTGGATGG  |
